# Supplementary material for: Extensive methodology screening of meso-tetrakys-(furan-2-yl)-porphyrin microwave-assisted synthesis
Source: Royal Society of Chemistry journal article supplement (doi:10.1039/c5nj02888d), 2016-01-01
Supplement: c5nj02888d1.pdf [file c5nj02888d1.pdf]

SUPPLEMENTARY INFORMATION

**Extensive methodology screening of *meso*-tetrakis-(furan-2-yl)-porphyrin  
microwave-assisted synthesis**

F. Bosca,<sup>a</sup> S. Tagliapietra,<sup>a</sup> C. Garino,<sup>b</sup> G. Cravotto <sup>\*a</sup> and A. Barge<sup>\*a</sup>

Figure S1. <sup>1</sup>H NMR spectrum of compound **1** (300 MHz, THF-*d*<sub>8</sub>)

Figure S2. <sup>1</sup>H NMR spectrum of compound **2** (300 MHz, CDCl<sub>3</sub>)

Figure S3. <sup>1</sup>H NMR spectrum of compound **3** (300 MHz, CDCl<sub>3</sub>)

Figure S4. <sup>1</sup>H NMR spectrum of compound **5** (300 MHz, THF-*d*<sub>8</sub>)

Figure S5. Electronic absorption and photoemission spectra of compounds **1** and **2**

Figure S6. Extinction Coefficients of compounds **1** and **2**.

Figure S7. HPLC-MS analysis of compound **4**.

Figure S8. APCI-MS (positive molality) analysis of compound **4**

Figure S9. HPLC-MS of compound **1**.

Figure S10. IR spectrum of compound **2**.

Figure S9. Epsilon of compounds **1** and **2**.

Figure S1.  $^1\text{H}$  NMR spectrum of compound **1** (300 MHz,  $\text{THF-d}_8$ )

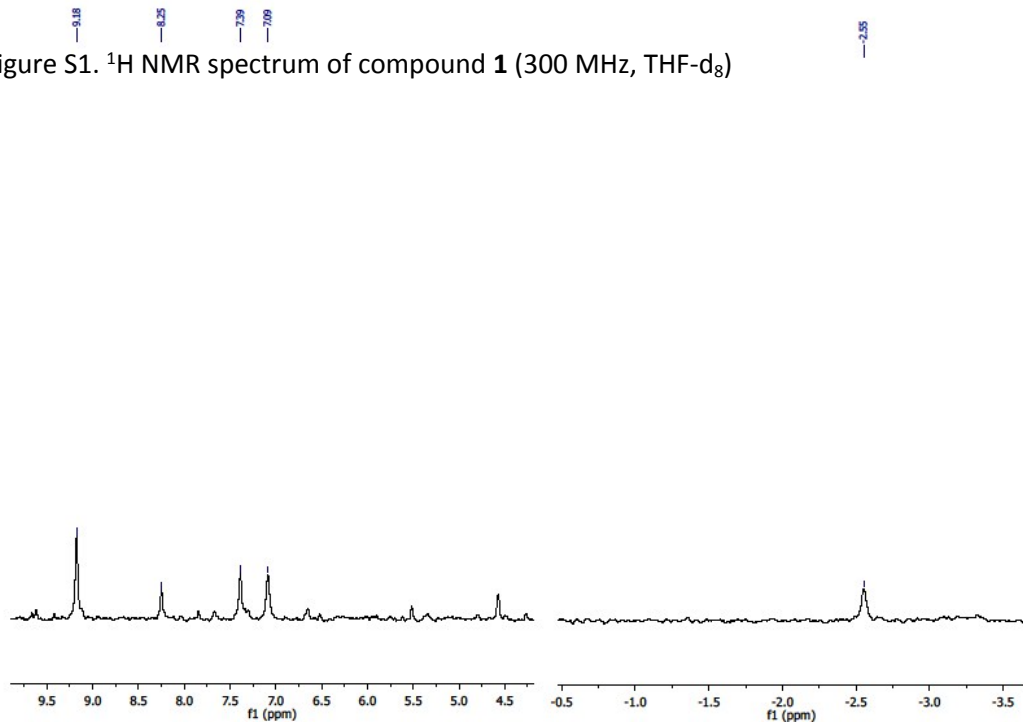

Figure S2.  $^1\text{H}$  (300 MHz,

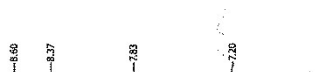

NMR spectrum of compound **2** ( $\text{CDCl}_3$ )

Figure S3.  $^1\text{H}$  (300 MHz,

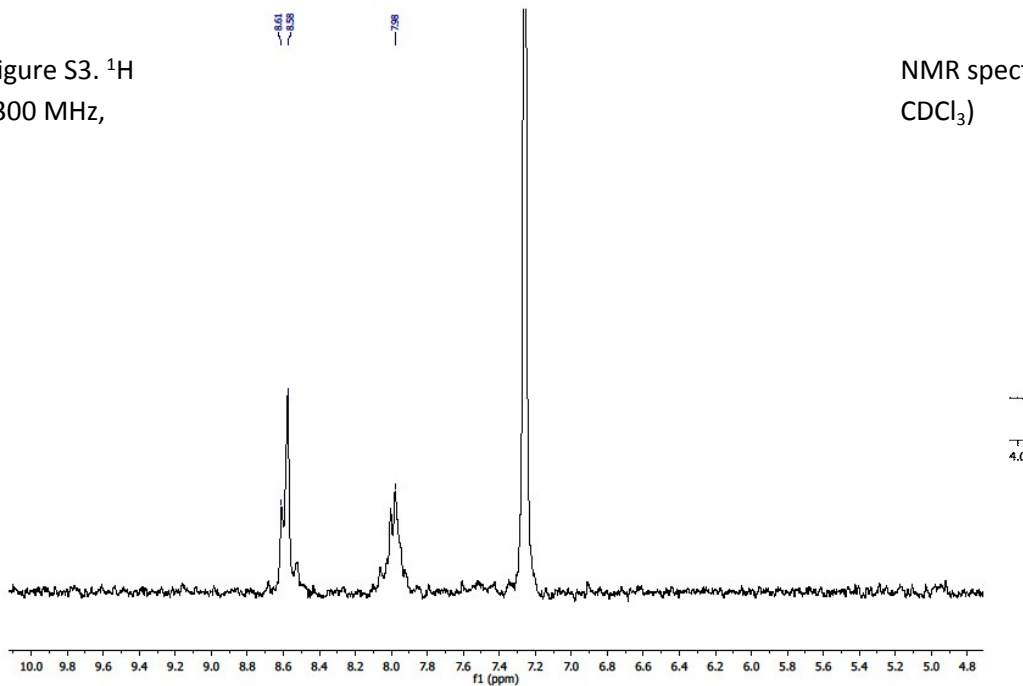

NMR spectrum of compound **3** ( $\text{CDCl}_3$ )

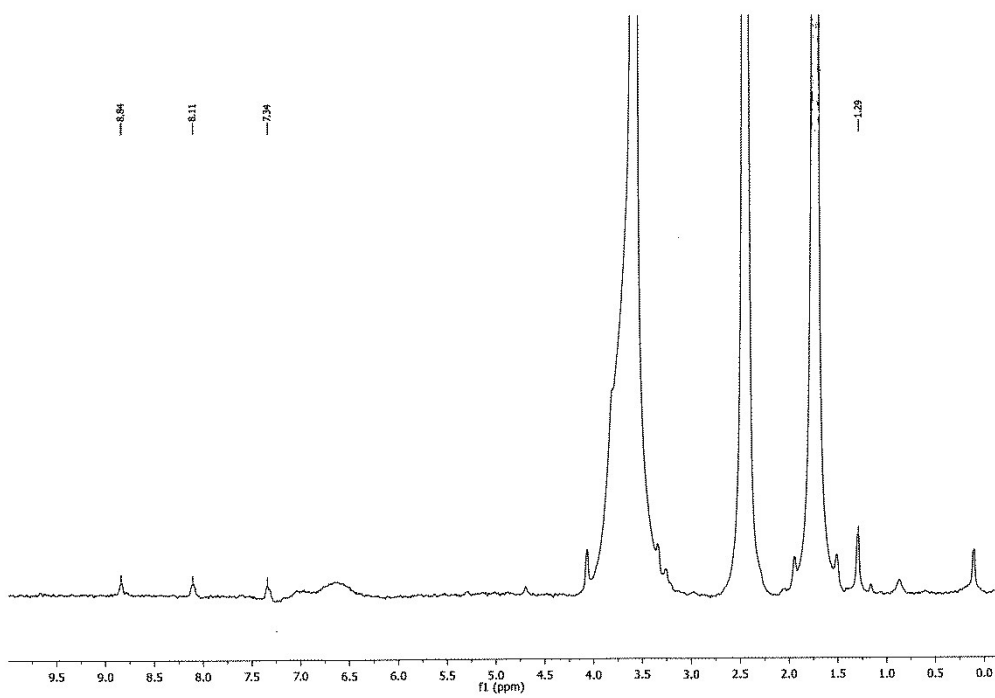

Figure S4. <sup>1</sup>H NMR spectrum of compound **5** (300 MHz, THF-d<sub>8</sub>)

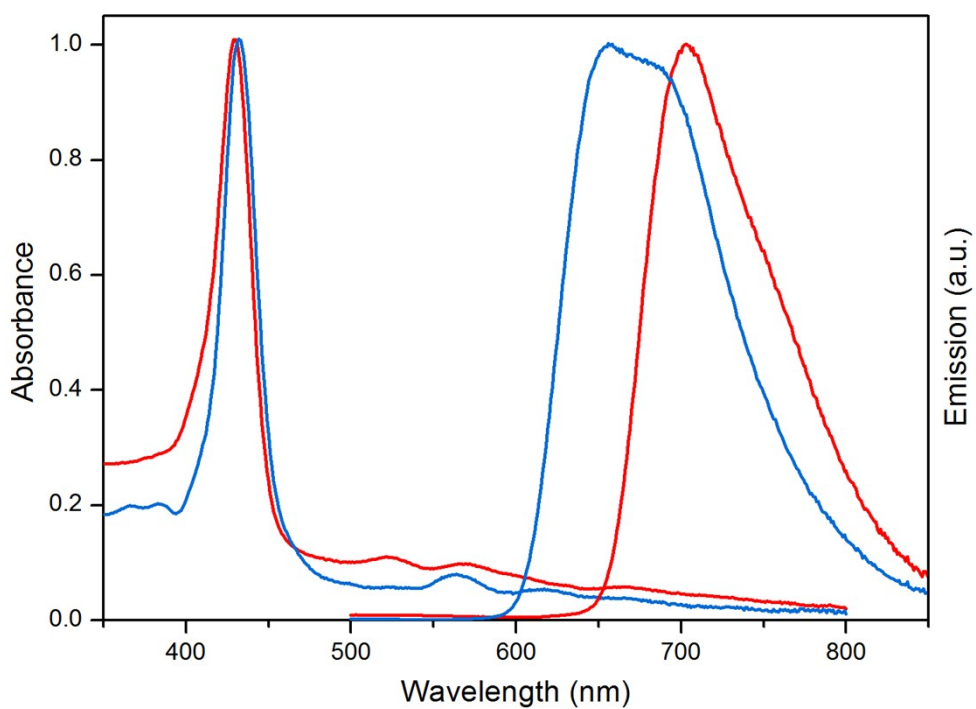

Figure S5. Electronic absorption (left) and photoemission (right) spectra of *meso*-tetrakis-(furan-2-yl)-porphyrin (red) and Zn(II)-*meso*-tetrakis-(furan-2-yl)-porphyrin (blue) in THF solution.

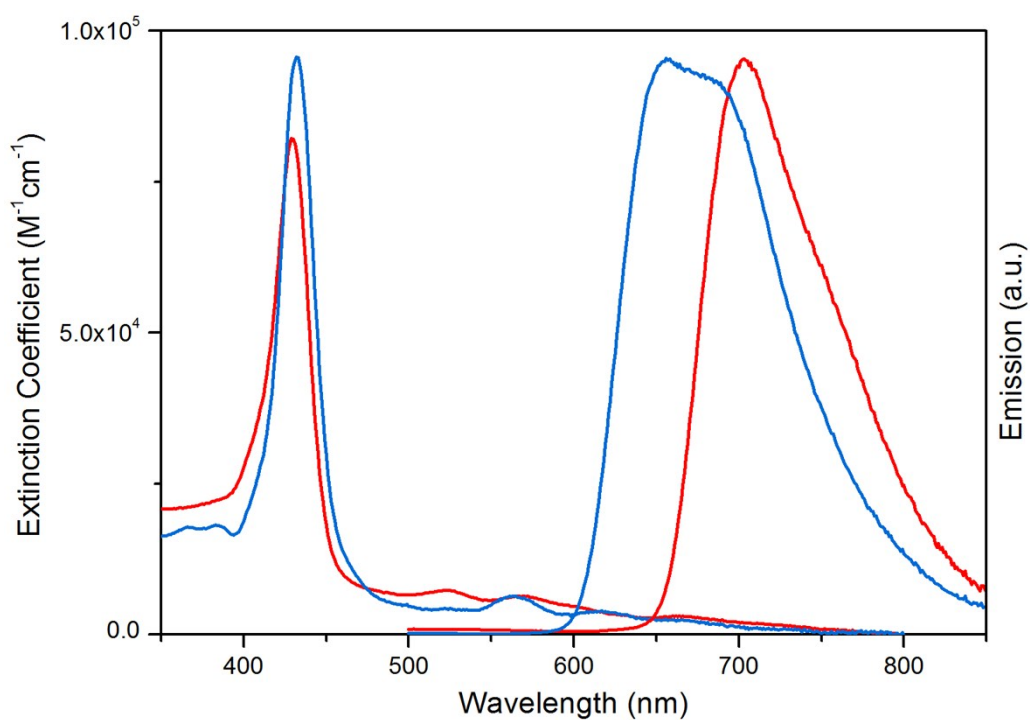

Figure S6. Extinction Coefficient (left) and photoemission (right) spectra of *meso*-tetrakis-(furan-2-yl)-porphyrin (red) and Zn(II)-*meso*-tetrakis-(furan-2-yl)-porphyrin (blue) in THF solution.

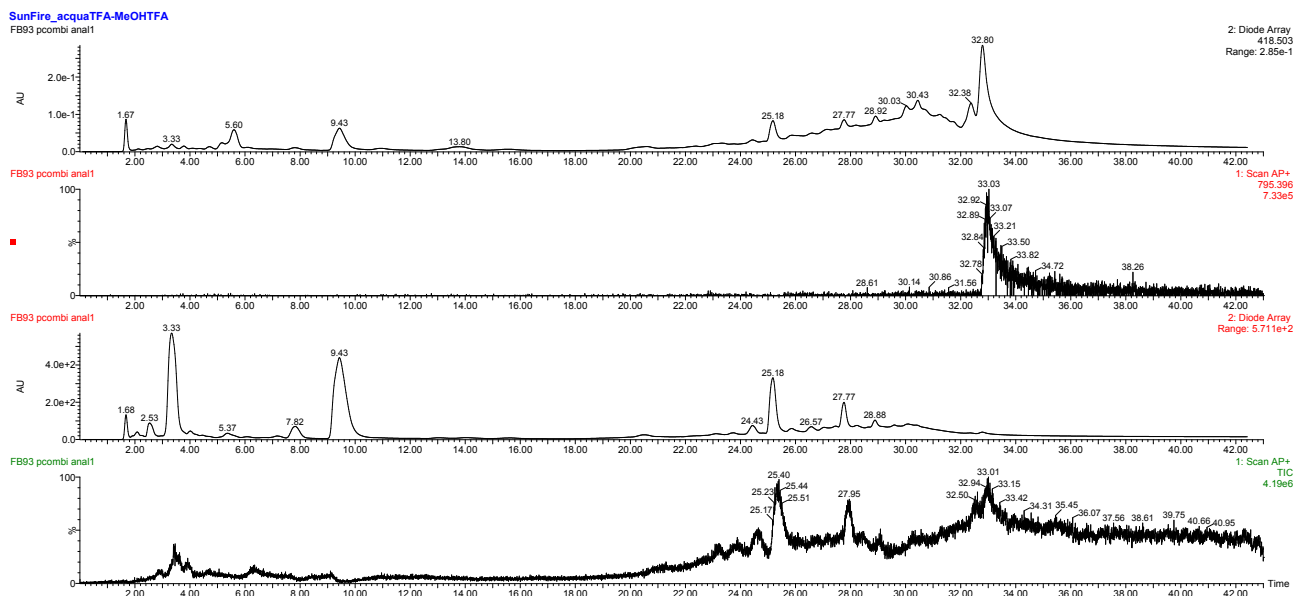

Figure S7. HPLC-MS analysis of compound 4.

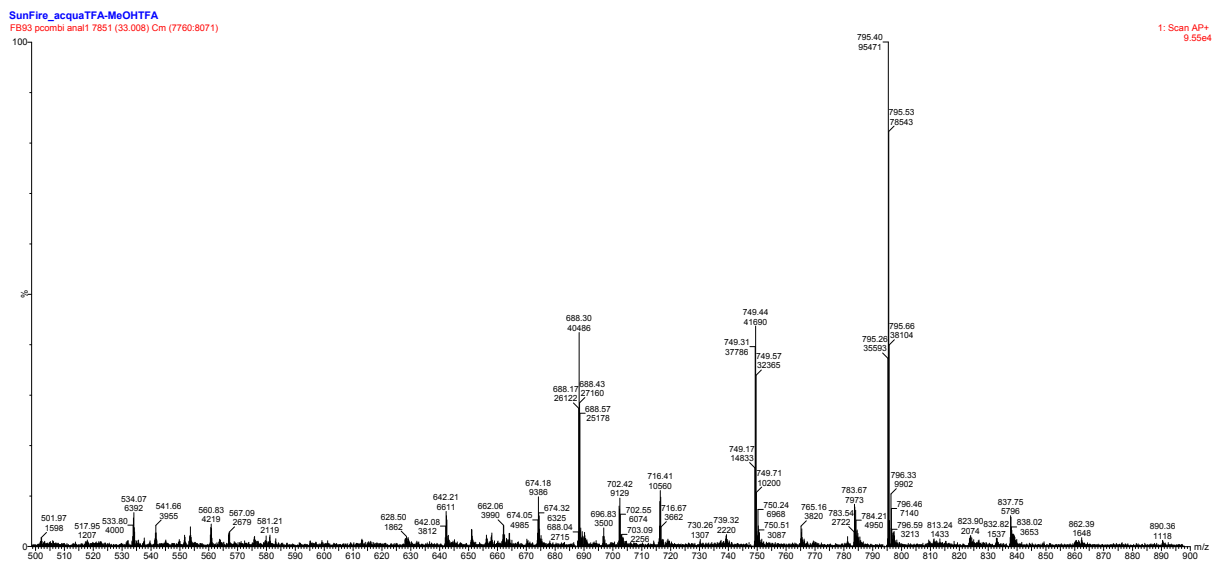

Figure S8. APCI-MS (positive molality) analysis of compound 4

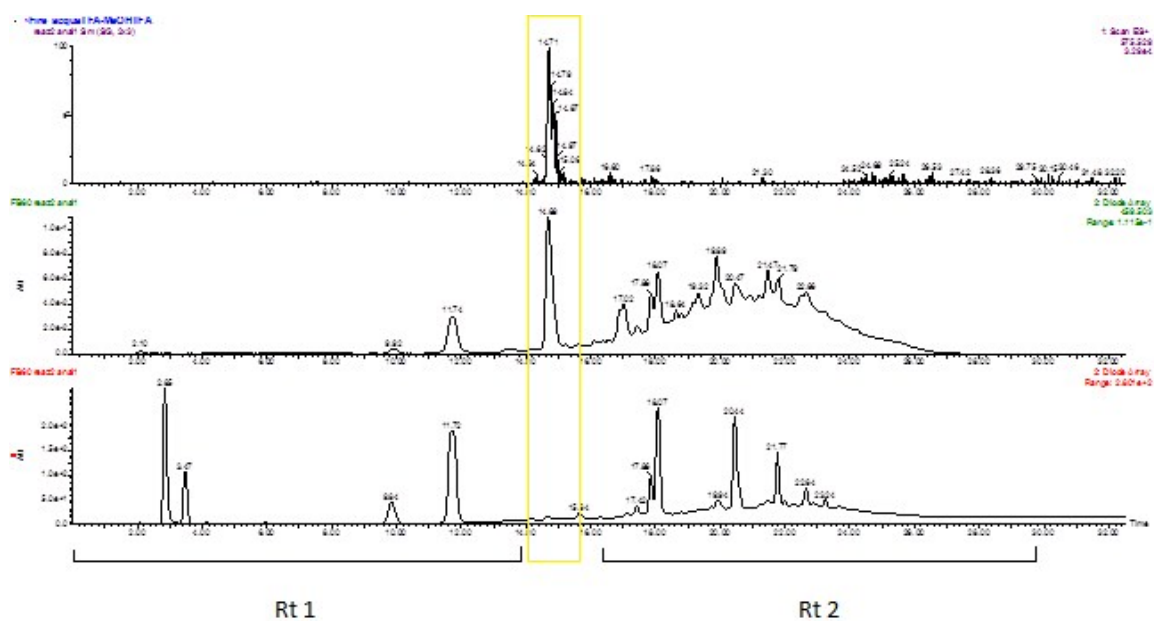

Figure S9. HPLC-MS of compound 1. Upper trace: ESI+ profile of m/z= 575.5 (peak of interest); middle trace: UV profile at 459.5 nm; bottom trace: Diode array max plot. Rt1 and Rt2 indicate the two regions considered in the impurity analysis.

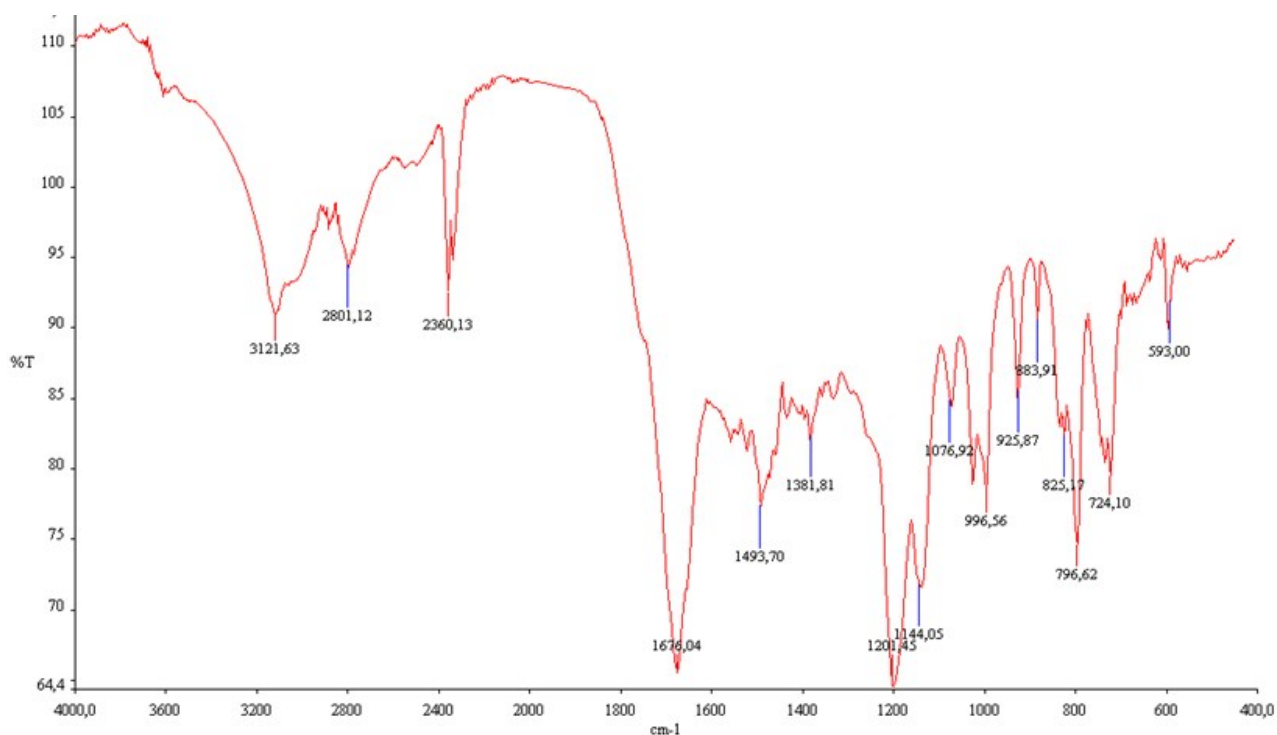

Figure S10. IR spectrum of compound 2.
